# Supplementary material for: Exaggerated groups: amplification in ensemble coding of temporal and spatial features
Source: Proc Biol Sci. 2018 May 23;285(1879):20172770. doi: 10.1098/rspb.2017.2770 (PMC5998104; doi:10.1098/rspb.2017.2770)
Supplement: Data Experiment 1 [file rspb20172770supp2.csv]

subject	task	setsize	Slope	PSE
1	TF	1	0.35278	-0.29905
2	TF	1	0.35359	-0.78046
3	TF	1	0.30072	-0.64573
4	TF	1	0.45502	-1.9056
5	TF	1	0.42925	-0.37424
6	TF	1	0.3089	-2.822
7	TF	1	0.30946	-1.7146
8	TF	1	0.43098	0.52044
9	TF	1	0.36791	-0.19098
10	TF	1	0.37398	0.66043
11	TF	1	0.34858	-2.3456
12	TF	1	0.48772	-0.71172
13	TF	1	0.5094	-1.8972
14	TF	1	0.40498	-1.8757
15	TF	1	0.31432	-0.49554
16	TF	1	0.38749	-1.6057
17	TF	1	0.14722	1.3837
18	TF	1	0.51738	-1.4633
19	TF	1	0.34797	-0.0228
20	TF	1	0.4272	-0.80574
1	TF	4	0.66963	-0.77487
2	TF	4	0.60225	2.8504
3	TF	4	0.5368	-0.042439
4	TF	4	0.66535	0.48822
5	TF	4	0.701	0.027236
6	TF	4	0.90034	-2.9041
7	TF	4	0.45647	1.5715
8	TF	4	1.1021	1.2524
9	TF	4	0.69904	0.23965
10	TF	4	0.63056	1.2227
11	TF	4	0.38883	-0.067187
12	TF	4	0.64138	1.397
13	TF	4	0.83383	1.6862
14	TF	4	1.0099	-2.1179
15	TF	4	0.54429	0.14161
16	TF	4	0.52004	-0.83784
17	TF	4	0.16841	0.20646
18	TF	4	0.618	-1.7932
19	TF	4	0.52867	1.7348
20	TF	4	0.76421	0.72951
1	TF	8	0.64412	0.37515
2	TF	8	0.81178	3.5372
3	TF	8	0.68506	-0.11303
4	TF	8	1.8188	2.3996
5	TF	8	1.0755	1.9641
6	TF	8	1.0883	-2.5571
7	TF	8	0.33995	2.3255
8	TF	8	1.3596	3
9	TF	8	0.56513	0.22844
10	TF	8	0.47376	1.7722
11	TF	8	0.69263	0.64681
12	TF	8	0.64181	1.0623
13	TF	8	0.93633	2.154
14	TF	8	0.46075	-3.0916
15	TF	8	0.49698	1.5376
16	TF	8	0.49119	-1.1708
17	TF	8	0.20217	-2.3314
18	TF	8	0.60891	-1.5305
19	TF	8	0.91061	0.77991
20	TF	8	0.61348	1.0768
1	TF	14	1.0421	0.72746
2	TF	14	0.69362	3.2419
3	TF	14	0.39841	0.20503
4	TF	14	0.7369	2.7304
5	TF	14	0.7146	1.0744
6	TF	14	0.50971	-1.9352
7	TF	14	0.33788	2.1325
8	TF	14	1.0924	2.9746
9	TF	14	0.553	1.5778
10	TF	14	0.50487	3.0966
11	TF	14	0.52237	1.3442
12	TF	14	0.6355	1.2073
13	TF	14	0.81079	3.2894
14	TF	14	0.5081	-2.2256
15	TF	14	0.35581	1.2955
16	TF	14	0.51594	-0.19055
17	TF	14	0.36816	0.9985
18	TF	14	0.53039	-0.60882
19	TF	14	0.62493	1.7331
20	TF	14	1.153	0.18871
1	Size	1	0.26233	-1.2808
2	Size	1	0.26727	0.65486
3	Size	1	0.32618	-3.5671
4	Size	1	0.35673	-1.6132
5	Size	1	0.54936	-0.67619
6	Size	1	0.34627	0.15853
7	Size	1	0.24522	-0.82035
8	Size	1	0.56014	2.431
9	Size	1	0.40883	0.094738
10	Size	1	0.25673	-0.11336
11	Size	1	0.48722	0.70394
12	Size	1	0.34325	0.45293
13	Size	1	0.53858	-0.18468
15	Size	1	0.3043	-1.588
16	Size	1	0.38004	-0.16453
17	Size	1	0.19525	3.2759
18	Size	1	0.27683	-1.0117
19	Size	1	0.39206	-1.327
20	Size	1	0.58242	1.2512
1	Size	4	0.84019	-0.72704
2	Size	4	0.92181	1.7644
3	Size	4	0.87624	-2.7737
4	Size	4	0.78555	2.9662
5	Size	4	0.98913	-0.88015
6	Size	4	0.52559	0.50967
7	Size	4	0.36982	-0.12213
8	Size	4	0.79466	5.6221
9	Size	4	0.67208	-0.38028
10	Size	4	0.33827	-0.89666
11	Size	4	0.61185	1.1438
12	Size	4	0.96276	-0.96467
13	Size	4	0.61105	-0.02439
15	Size	4	0.81871	-0.66794
16	Size	4	0.53713	-1.2653
17	Size	4	0.25619	3.5301
18	Size	4	0.3111	1.2491
19	Size	4	0.70946	0.023613
20	Size	4	0.74044	1.9822
1	Size	8	0.92478	-0.033927
2	Size	8	1.4259	2.0119
3	Size	8	0.61739	-1.3616
4	Size	8	0.72925	3.074
5	Size	8	0.7026	1.2913
6	Size	8	0.84916	1.0742
7	Size	8	0.31428	0.16399
8	Size	8	1.0027	5.1886
9	Size	8	0.45727	0.41672
10	Size	8	0.38387	0.36109
11	Size	8	0.78686	-0.16025
12	Size	8	0.55148	0.11856
13	Size	8	0.48544	0.62876
15	Size	8	0.59264	0.78372
16	Size	8	0.58646	-1.3283
17	Size	8	0.21022	4.3617
18	Size	8	0.42745	2.0834
19	Size	8	0.62527	0.26721
20	Size	8	0.56981	3.041
1	Size	14	1.2477	0.72625
2	Size	14	1.1215	3.2336
3	Size	14	0.64571	-1.6865
4	Size	14	0.84013	3.4599
5	Size	14	0.6867	2.3943
6	Size	14	1.0646	1.706
7	Size	14	0.29009	0.43091
8	Size	14	0.94558	6.4762
9	Size	14	0.51426	-0.20658
10	Size	14	0.578	0.69065
11	Size	14	0.71727	1.6894
12	Size	14	0.72829	1.1829
13	Size	14	0.46957	-0.6894
15	Size	14	0.54896	0.90757
16	Size	14	0.52608	-1.3514
17	Size	14	0.11336	5.8558
18	Size	14	0.46861	2.6228
19	Size	14	1.0038	0.84121
20	Size	14	0.45662	1.1475
